# Supplementary material for: Three-dimensional graphene aerogel–mesoporous carbon composites as novel coatings for solid-phase microextraction for the efficient enrichment of brominated flame retardants
Source: Royal Society of Chemistry journal article supplement (doi:10.1039/c5nj03652f), 2016-01-01
Supplement: c5nj03652f1.pdf [file c5nj03652f1.pdf]

## Electronic Supplementary Information

### **Three-dimensional graphene aerogels-mesoporous carbon composites as novel coating of solid-phase microextraction for the efficient enrichment of brominated flame retardants**

Xuemei Wang<sup>a,b,\*</sup>, Muxin Lu<sup>a</sup>, Huan Wang<sup>a</sup>, Pengfei Huang<sup>a</sup>, Xiaomin Ma<sup>a</sup>, Chun Cao<sup>c</sup>,

Xinzhen Du<sup>a,b</sup>

<sup>a</sup> College of Chemistry and Chemical Engineering, Northwest Normal University,

<sup>b</sup> Key Laboratory of Bioelectrochemistry & Environmental Analysis of Gansu Province,

<sup>c</sup> College of Geography and Environment Science, Northwest Normal University, Lanzhou

730070, P. R. China

---

\* Corresponding author. Tel: +86-931-7971035

*E-mail address:* wxm98@163.com (X.M. Wang)

**Fig. S-1** Effect of extraction time (a), temperature (b), stirring rate (c) and ionic strength (d) on the extraction efficiency.

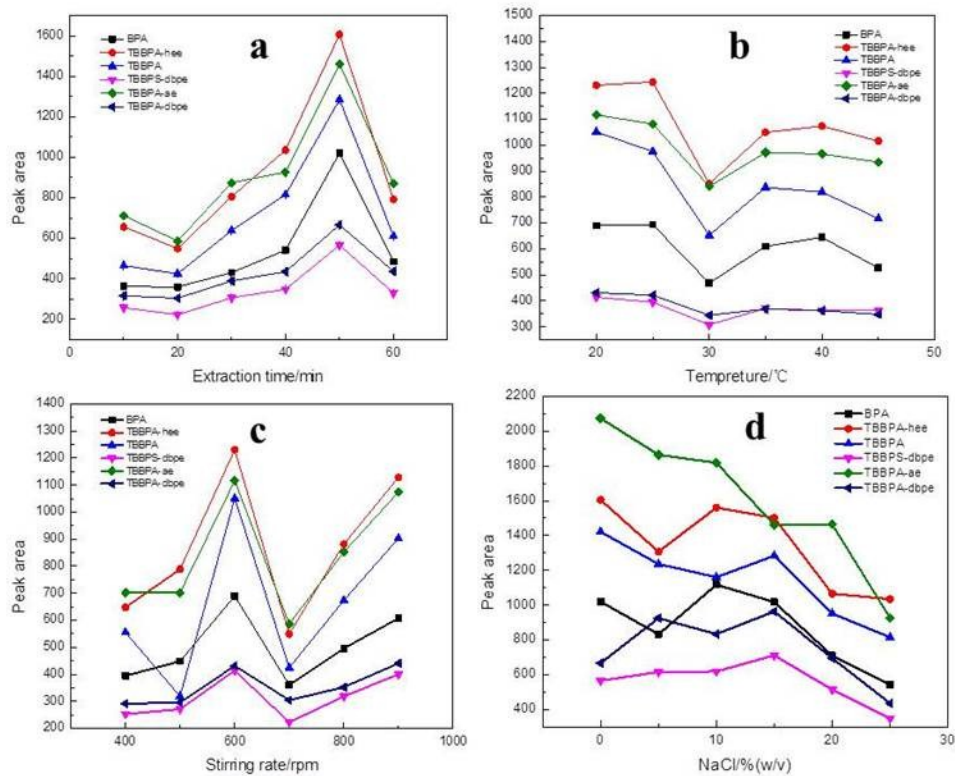

**Table S-1.** Chemical structures of BFRs considered in this work

| Abbreviation | Name                                                | Chemical Structure                                                                   |
|--------------|-----------------------------------------------------|--------------------------------------------------------------------------------------|
| BPA          | Bisphenol A                                         | 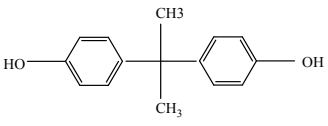   |
| TBBPA-hee    | Tetrabromobisphenol-A bis(2-hydroxyethyl ether)     |    |
| TBBPA        | Tetrabromobisphenol-A                               |    |
| TBBPS-dbpe   | Tetrabromobisphenol-S-bis-(2,3-dibromopropyl ether) |   |
| TBBPA-ae     | Tetrabromobisphenol-A-bis(allyl ether)              |  |
| TBBPA-dbpe   | Tetrabromobisphenol-A-bis(2,3-dibromopropyl ether)  |  |
